# Supplementary material for: Caracterización de las prolaminas en variedades indígenas españolas de trigo duro (Triticum turgidum (L.) TELL) y su relación con la calidad semolera
Source: Royal Society of Chemistry journal article supplement (doi:10.1039/c2ob26209f), 2012-05-23
Supplement: c2ob26209f.pdf [file c2ob26209f.pdf]

## SUPPORTING INFORMATION

# Corrole isomers: intrinsic gas-phase shapes *via* travelling wave ion mobility mass spectrometry and dissociation chemistries *via* tandem mass spectrometry

Maíra Fasciotti,<sup>a</sup> Alexandre F. Gomes,<sup>b</sup> Fabio C. Gozzo,<sup>b</sup> Bernardo A. Iglesias,<sup>c</sup> Gilberto F. de Sá,<sup>d</sup> Romeu J. Daroda,<sup>e</sup> Motoki Toganoh,<sup>f</sup> Hiroyuki Furuta,<sup>\*,f</sup> Koiti Araki<sup>\*,c</sup> and Marcos N. Eberlin<sup>\*,a</sup>

## Contents

- (1) <sup>1</sup>H NMR spectra of all compounds.
- (2) **HPLC traces of all compounds with their retention time.**
- (3) DFT Calculations of the optimized energies (equilibrium geometry) using the Gaussian03 program for all the possible sites of protonation.
- (4) Collision cross sections (CCS) in Å<sup>2</sup> estimated by the MOBCAL program.

### <sup>1</sup>H NMR spectra of all compounds.

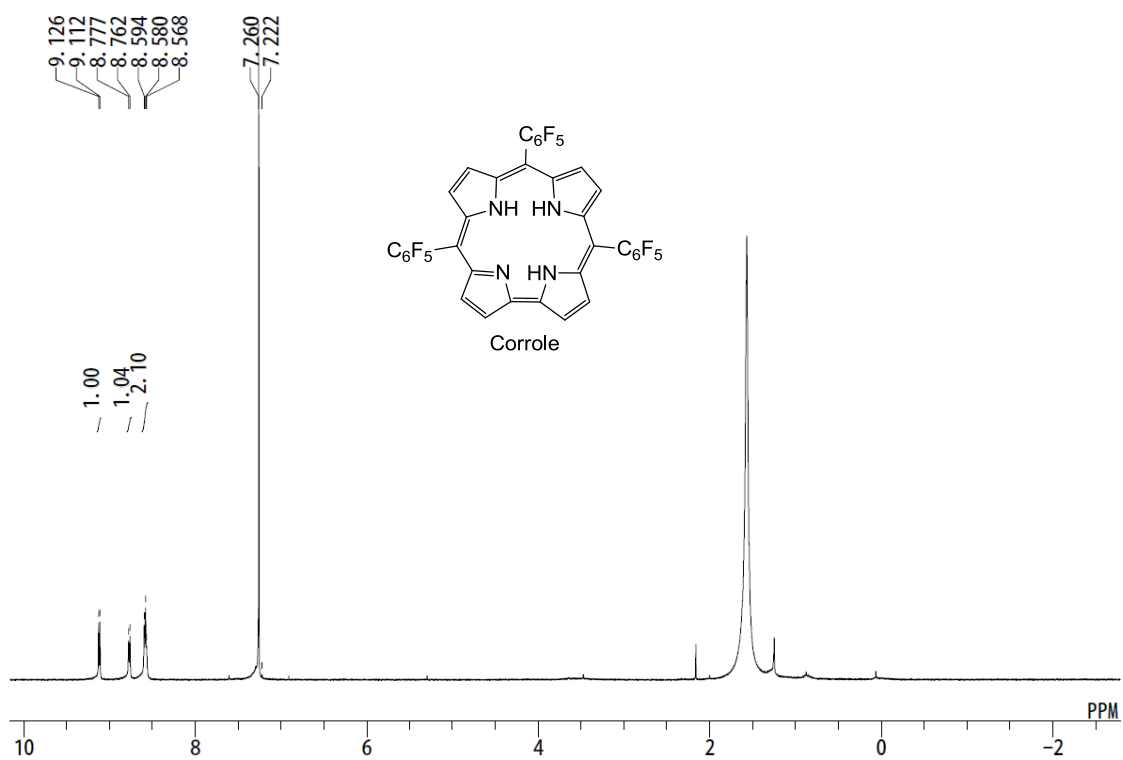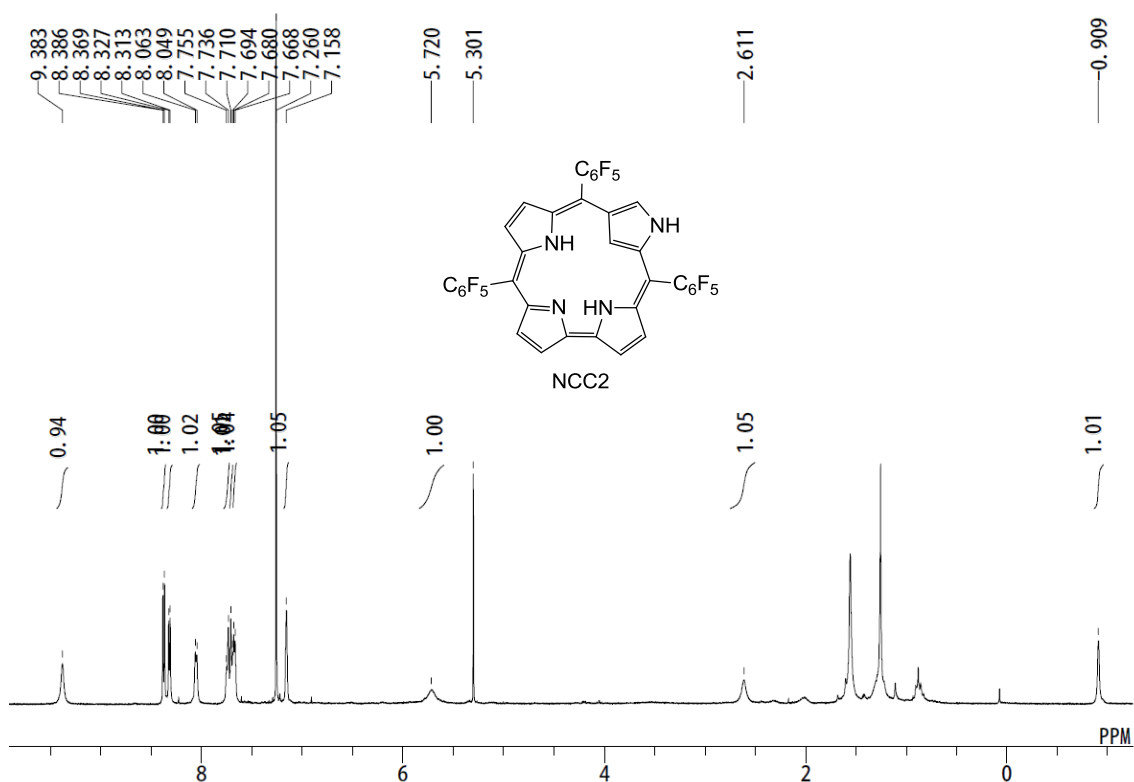

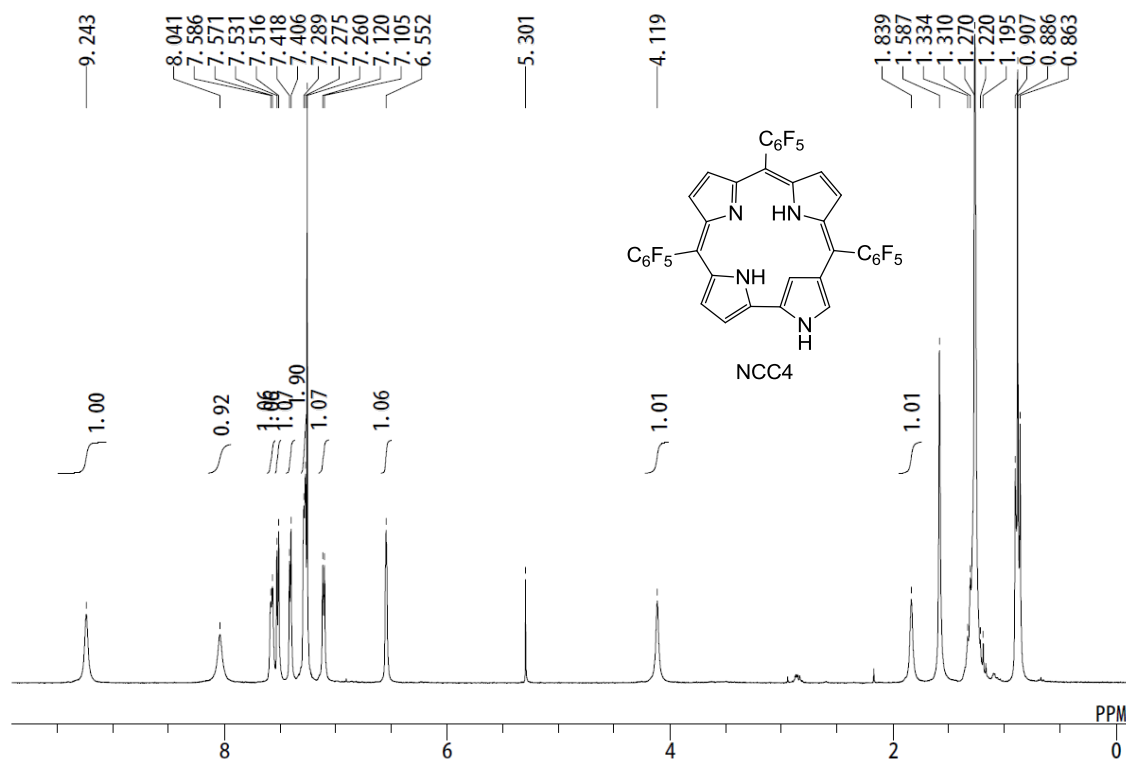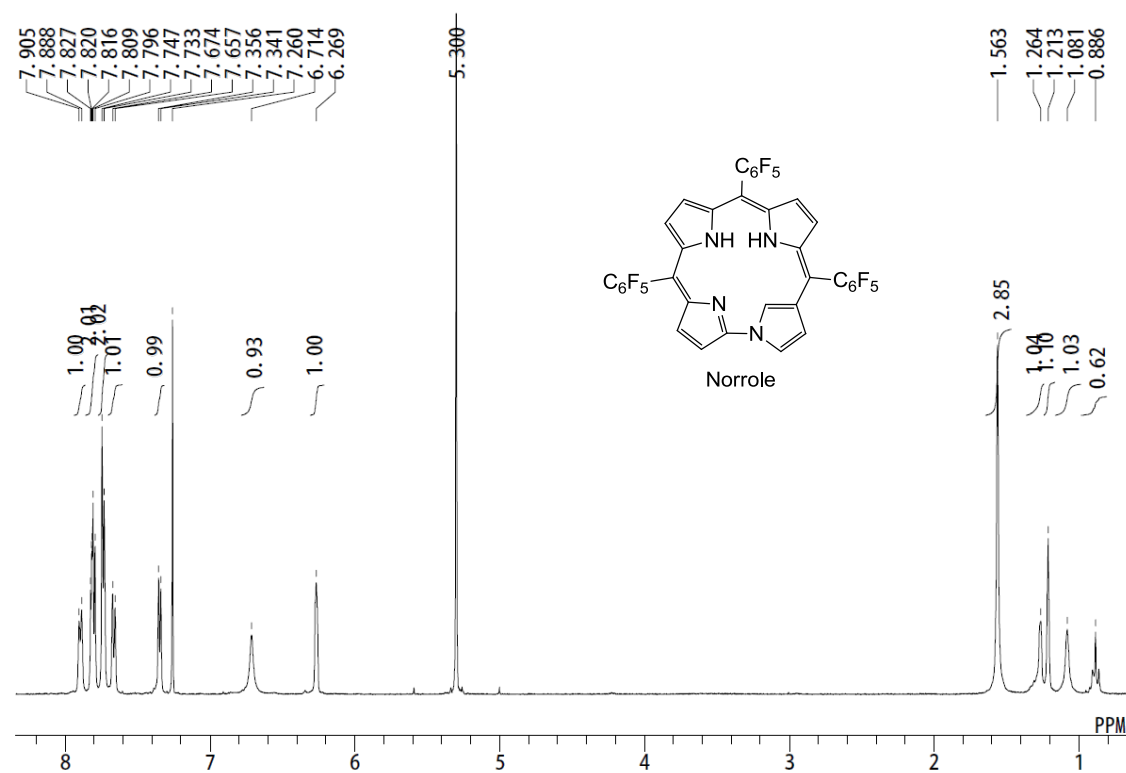

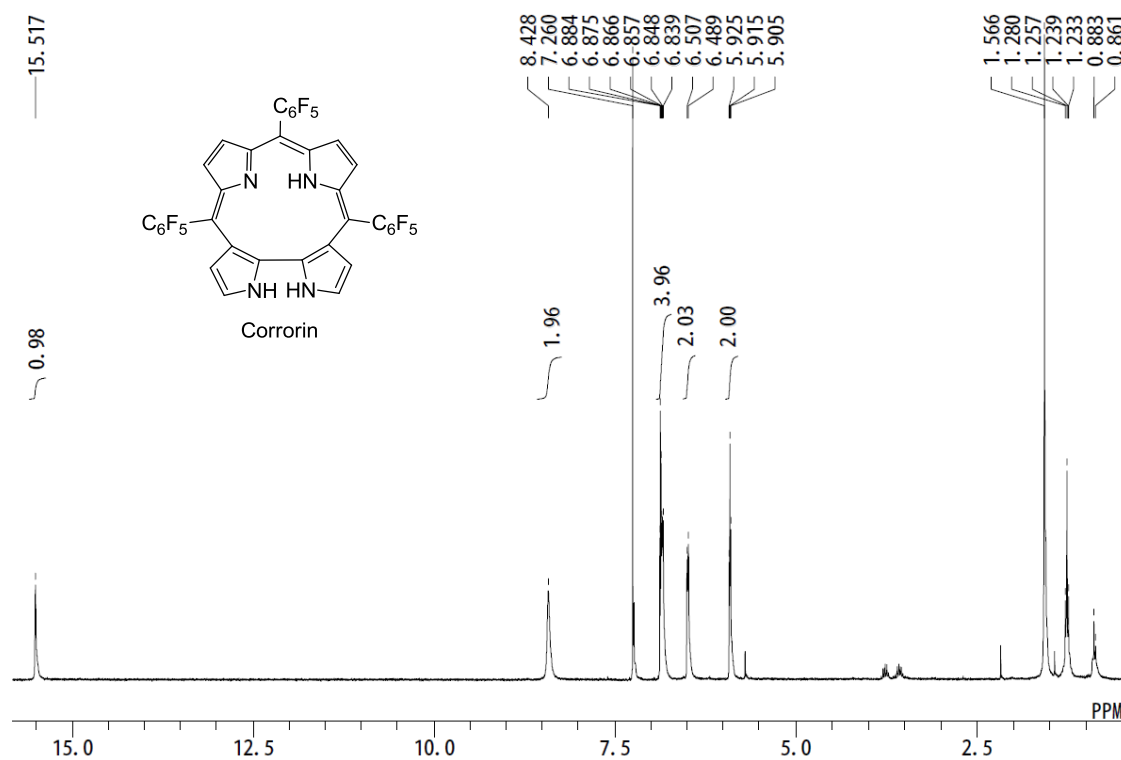

<sup>1</sup>H NMR spectra were recorded in CDCl<sub>3</sub> solution on a JNM-AL SERIES FT-NMR spectrometer (JEOL) at 300 MHz, and chemical shifts were reported relative to a residual proton of a deuterated solvent, CHCl<sub>3</sub> ( $\delta = 7.26$ ) in ppm.

### HPLC traces of all compounds with their retention time.

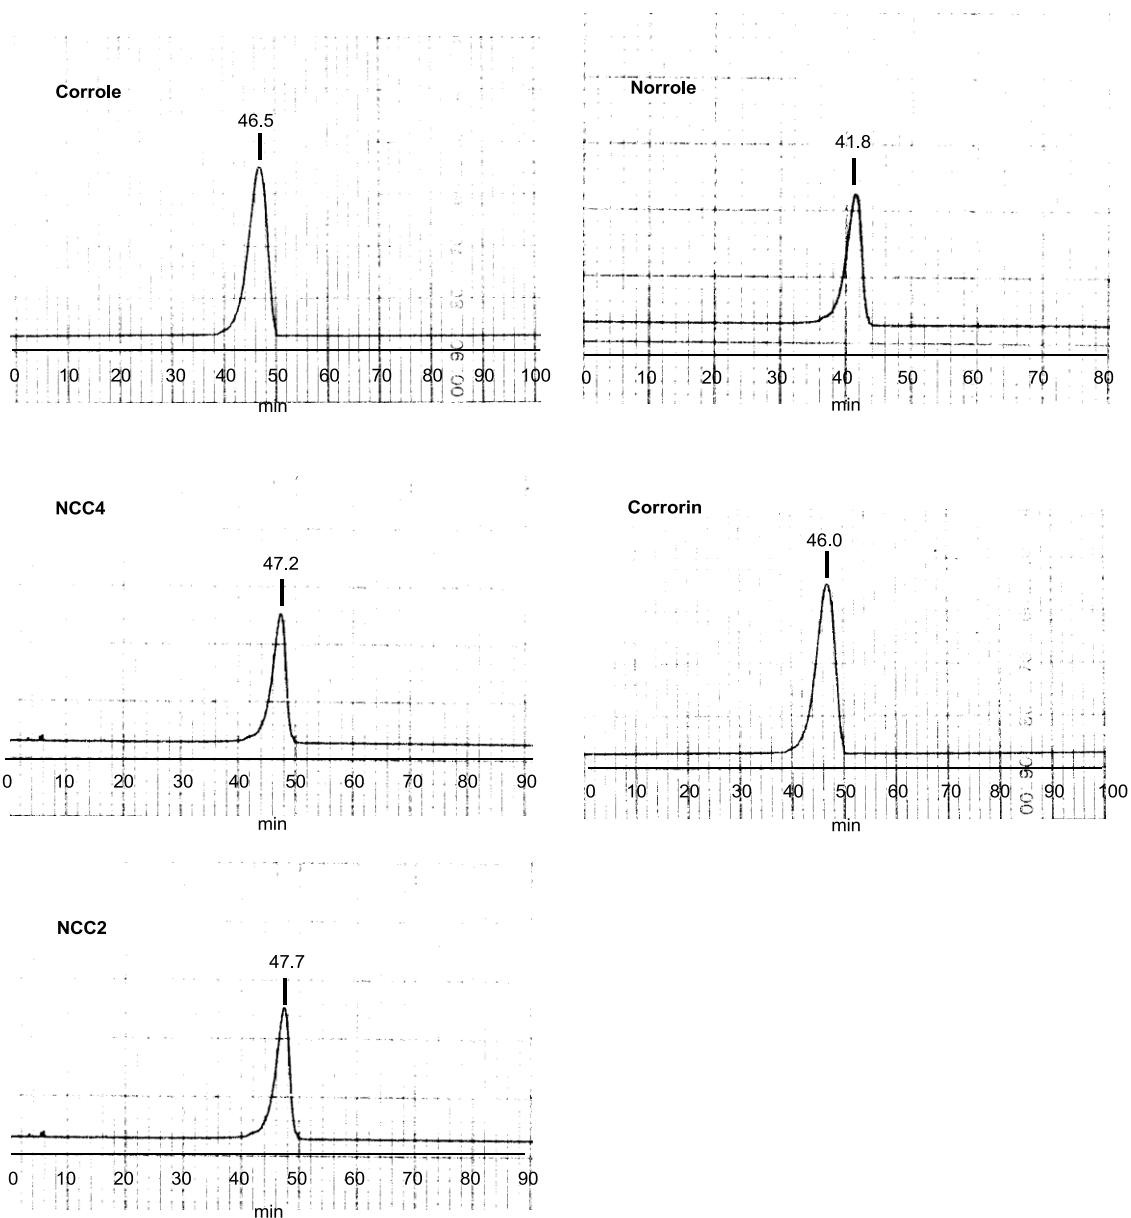

HPLC experiments were performed on a LC-9201R unit composed of a PI-50 pump 3702 UV-detector and JAIGEL-SH-043-15 column filled with silica gel (Japan Analytical Industry Co., Ltd). Eluent was  $\text{CH}_2\text{Cl}_2/\text{CH}_3\text{OH} = 99/1$ , and flow rate was 3.5 ml/min for all experiments.

**Table S1.** Energy optimization (equilibrium geometry) estimated by the Gaussian03 program, for ions representing all possible protonation sites of each isomer.

| Species           | Structure                                                                           | E (hartree)   | E <sub>NORMALIZED</sub> (kcal mol <sup>-1</sup> ) |
|-------------------|-------------------------------------------------------------------------------------|---------------|---------------------------------------------------|
| <b>Corrole_A*</b> | 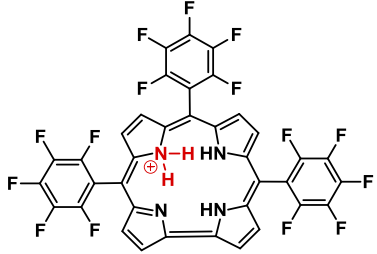   | —             | —                                                 |
| <b>Corrole_B</b>  |    | -3133.3353351 | <b>+37.82</b>                                     |
| <b>Corrole_C</b>  |   | -3133.3444112 | <b>+32.12</b>                                     |
| <b>Corrole_D</b>  |  | -3133.3956063 | <b>0.00</b>                                       |

\*Species **Corrole\_A** is unstable and isomerizes to **Corrole\_D** during geometry optimization.

| Species            | Structure                                                                           | E (hartree)   | E <sub>NORMALIZED</sub> (kcal mol <sup>-1</sup> ) |
|--------------------|-------------------------------------------------------------------------------------|---------------|---------------------------------------------------|
| <b>Corrorin_A*</b> | 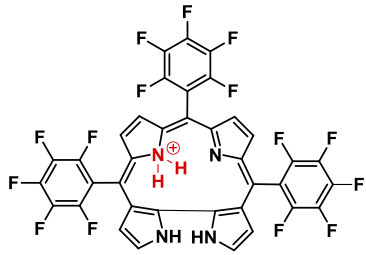   | —             | —                                                 |
| <b>Corrorin_B</b>  |    | -3133.3780051 | <b>0.00</b>                                       |
| <b>Corrorin_C</b>  |   | -3133.3004419 | <b>+48.67</b>                                     |
| <b>Corrorin_D</b>  |  | -3133.3005566 | <b>+48.60</b>                                     |

\*Species **Corrorin\_A** is unstable and isomerizes to **Corrorin\_B** during geometry optimization.

| Species | Structure                                                                           | E<br>(hartree) | E <sub>NORMALIZED</sub><br>(kcal mol <sup>-1</sup> ) |
|---------|-------------------------------------------------------------------------------------|----------------|------------------------------------------------------|
| NCC2_A* | 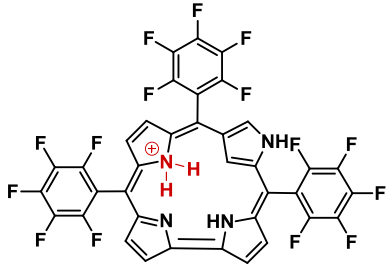   | -3133.3407083  | <b>+25.01</b>                                        |
| NCC2_B  |    | -3133.3084771  | <b>+45.24</b>                                        |
| NCC2_C  |   | -3133.3330736  | <b>+29.81</b>                                        |
| NCC2_D  |  | -3133.3805720  | <b>0.00</b>                                          |

\*Species **NCC2\_A** is unstable and isomerizes to **NCC2\_D** during geometry optimization.



| Species | Structure                                                                           | E<br>(hartree) | E <sub>NORMALIZED</sub><br>(kcal mol <sup>-1</sup> ) |
|---------|-------------------------------------------------------------------------------------|----------------|------------------------------------------------------|
| NCC4_A  | 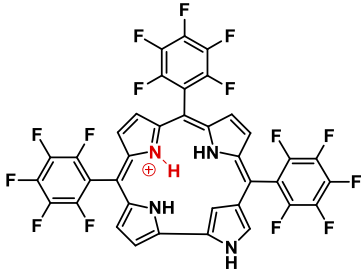   | -3133.3769576  | <b>0.00</b>                                          |
| NCC4_B  |    | -3133.3309288  | <b>+28.88</b>                                        |
| NCC4_C  |   | -3133.3039268  | <b>+45.83</b>                                        |
| NCC4_D* |  | —              | —                                                    |

\*Species **NCC4\_D** is unstable and isomerizes to **NCC4\_A** during geometry optimization.

| Species    | Structure                                                                           | E<br>(hartree) | E <sub>NORMALIZED</sub><br>(kcal mol <sup>-1</sup> ) |
|------------|-------------------------------------------------------------------------------------|----------------|------------------------------------------------------|
| Norrole_A* | 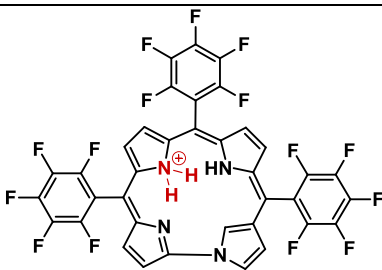   | —              | —                                                    |
| Norrole_B  |    | -3133.3156630  | <b>+30.94</b>                                        |
| Norrole_C  |   | -3133.3092324  | <b>+34.98</b>                                        |
| Norrole_D  |  | -3133.3649717  | <b>0.00</b>                                          |

\*Species **Norrole\_A** is unstable and isomerizes to **Norrole\_D** during geometry optimization.

**Table S2.** Collision cross sections (CCS) in Å<sup>2</sup> estimated by the MOBICAL program with the Trajectory Method (TM), for the ions of each isomer representing sites of protonation of lowest energy.

| Species         | Structure                                                                           | CCS (Å <sup>2</sup> ) |
|-----------------|-------------------------------------------------------------------------------------|-----------------------|
| <b>CORROLE</b>  | 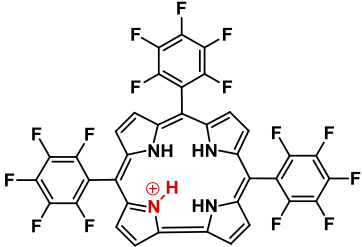   | <b>210.77</b>         |
| <b>CORRORIN</b> |    | <b>209.78</b>         |
| <b>NCC2</b>     |   | <b>212.23</b>         |
| <b>NCC4</b>     |  | <b>210.11</b>         |
| <b>NORROLE</b>  |  | <b>209.27</b>         |
